# Supplementary material
Source: PubMed Central journal article supplement (PMC9616206)
Supplement: NIHMS1834147-supplement-Supplemental_Publication_Material.pdf [file NIHMS1834147-supplement-Supplemental_Publication_Material.pdf]

## SUPPLEMENTAL MATERIALS

### **Impairment of Endothelial Function by Cigarette Smoke is not Caused by a Specific Smoke Constituent, but by Vagal Input from the Airway**

Pooneh Nabavizadeh, MD,<sup>\*1§</sup> Jiangtao Liu, MD,<sup>\*1</sup> Poonam Rao, MD,<sup>2,3§</sup> Sharina Ibrahim, MSc,<sup>2†</sup> Daniel D. Han, BS,<sup>2</sup> Ronak Derakhshandeh, MSc,<sup>2</sup> Huiliang Qiu, MD,<sup>2</sup> Xiaoyin Wang, MD,<sup>2</sup> Stanton A. Glantz, PhD,<sup>1,2,3</sup> Suzaynn F. Schick, PhD,<sup>4</sup> Matthew L. Springer, PhD<sup>1,2,3</sup>

<sup>1</sup> Cardiovascular Research Institute, University of California, San Francisco, San Francisco, California

<sup>2</sup> Division of Cardiology, University of California, San Francisco, San Francisco, California

<sup>3</sup> Center for Tobacco Control Research and Education, University of California, San Francisco, San Francisco, California

<sup>4</sup> Division of Occupational and Environmental Medicine, University of California, San Francisco, San Francisco, California

\*Contributed equally

Present address: <sup>§</sup>Division of Cardiology, University of Cincinnati, Cincinnati, Ohio, <sup>³</sup>CHRISTUS Good Shepherd/Texas A&M University Internal Medicine Residency Program, Longview, Texas, <sup>†</sup>NLO European Patent and Trademark Attorneys, The Hague, Netherlands.

#### **Detailed supplemental methods for acrolein and acetaldehyde gas generation and exposure conditions:**

To generate acrolein and acetaldehyde gases, we heated the respective gas permeation tubes using an EcoFlex gas generator (KIN-TEK Analytical, La Marque, TX). The generator was run for 1 hour to stabilize and ensure a steady flow rate at 40°C. A photoionization detector (ppbRae 3000) was used to measure the flow of aldehyde gases and to assess the steady flow. Once the flow rate was stabilized, the tubes were placed in the inner glass chamber of the generator and the generator was run at high flow rate of 5000 sccm, followed by lowering the flow rate to 786 sccm for acrolein tubes and 225 sccm for acetaldehyde tubes. These flow rates produced steady gas flow at 3.2 ppm for acrolein and 11.8 ppm for acetaldehyde.

The inhalation LC50 for acrolein in rats is 8 ppm over 4 hours according to the Material Safety Data Sheet from Matheson. To ensure that our acrolein concentration would be tolerable from an animal welfare standpoint, the following calculation was performed: Sidestream smoke from 1 cigarette contains ~437 µg of acrolein.<sup>16</sup> Our sidestream smoke exposure experiments use smoke from ~1/3 of a single cigarette, or ~145 µg acrolein, initially diluted in a ~0.02 m<sup>3</sup> chamber, which equals 7250 µg/m<sup>3</sup> or 7.25 mg/m<sup>3</sup> acrolein; this equals a starting concentration of ~3.16 ppm<sup>50</sup> before venting excess smoke to reach the highest tested sidestream particle concentrations in our previous exposure experiments. Comparable calculations for acetaldehyde (LC50 of 14,000 ppm/4 hours in rats (MSDS) and 1,600 µg/cigarette<sup>16</sup>) result in a concentration of ~14.8 ppm in our exposure chamber before venting excess smoke, so we used that as a maximum exposure concentration that is well under toxicity levels.

**Table S1.** Exposure conditions and FMD results for each rat in the order of exposure in the experiment shown in Figure 1.

| <i>Rat #</i> | <i>Exposure Condition</i>          | <i>Smoke level</i><br><i>(<math>\mu\text{g}/\text{m}^3</math> RSP)</i> | <i>Pre-FMD</i> | <i>Post-FMD</i> |
|--------------|------------------------------------|------------------------------------------------------------------------|----------------|-----------------|
| 201          | Air                                | N/A                                                                    | 3.92           | 3.77            |
| 202          | Conventional nicotine plus menthol | 600                                                                    | 10.87          | 6.12            |
| 203          | Reduced nicotine plus menthol      | 600                                                                    | 20.51          | 12.50           |
| 204          | Reduced nicotine plus menthol      | 600                                                                    | 16.67          | 15.91           |
| 205          | Reduced nicotine                   | 600                                                                    | 17.07          | 11.63           |
| 206          | Air                                | N/A                                                                    | 10.71          | 7.02            |
| 207          | Conventional nicotine              | 600                                                                    | 6.90           | 3.77            |
| 208          | Reduced nicotine                   | 600                                                                    | 15.22          | 8.89            |
| 209          | Conventional nicotine plus menthol | 600                                                                    | 12.07          | 6.45            |
| 210          | Conventional nicotine plus menthol | 600                                                                    | 12.20          | 9.30            |
| 211          | Conventional nicotine              | 600                                                                    | 17.07          | 12.20           |
| 212          | Reduced nicotine plus menthol      | 600                                                                    | 7.55           | 5.77            |
| 213          | Reduced nicotine                   | 600                                                                    | 13.64          | 14.58           |
| 214          | Conventional nicotine              | 600                                                                    | 13.46          | 3.39            |
| 215          | Reduced nicotine plus menthol      | 600                                                                    | 11.54          | 8.93            |
| 216          | Air                                | N/A                                                                    | 8.70           | 6.82            |
| 217          | Conventional nicotine              | 600                                                                    | 8.33           | 1.96            |
| 218          | Reduced nicotine plus menthol      | 600                                                                    | 12.50          | 10.20           |
| 219          | Conventional nicotine              | 600                                                                    | 11.76          | 11.54           |
| 220          | Conventional nicotine plus menthol | 600                                                                    | 11.32          | 9.80            |
| 221          | Reduced nicotine                   | 600                                                                    | 18.18          | 2.00            |
| 222          | Air                                | N/A                                                                    | 12.73          | 7.27            |
| 223          | Reduced nicotine                   | 600                                                                    | 7.55           | 3.57            |
| 224          | Reduced nicotine plus menthol      | 600                                                                    | 12.96          | 12.50           |
| 225          | Conventional nicotine plus menthol | 600                                                                    | 14.89          | 10.64           |
| 226          | Reduced nicotine                   | 600                                                                    | 7.69           | 4.17            |
| 227          | Conventional nicotine              | 600                                                                    | 17.02          | 9.80            |

|     |                                    |     |       |       |
|-----|------------------------------------|-----|-------|-------|
| 228 | Reduced nicotine                   | 600 | 12.50 | 11.54 |
| 229 | Conventional nicotine              | 600 | 10.00 | 8.51  |
| 230 | Reduced nicotine plus menthol      | 600 | 13.73 | 7.84  |
| 231 | Reduced nicotine plus menthol      | 600 | 20.00 | 15.00 |
| 232 | Conventional nicotine              | 600 | 16.00 | 7.14  |
| 233 | Reduced nicotine                   | 600 | 19.15 | 10.00 |
| 234 | Conventional nicotine plus menthol | 600 | 15.56 | 15.91 |
| 235 | Conventional nicotine plus menthol | 600 | 13.04 | 10.64 |
| 236 | Conventional nicotine plus menthol | 600 | 17.78 | 6.00  |
| 237 | Air                                | N/A | 9.30  | 9.30  |
| 239 | Air                                | N/A | 9.62  | 11.32 |
| 240 | Reduced nicotine plus menthol      | 200 | 9.52  | 8.51  |
| 241 | Conventional nicotine plus menthol | 200 | 12.24 | 4.17  |
| 242 | Conventional nicotine              | 200 | 9.80  | 9.43  |
| 243 | Reduced nicotine                   | 200 | 14.00 | 7.69  |
| 244 | Conventional nicotine plus menthol | 200 | 12.50 | 8.51  |
| 245 | Reduced nicotine                   | 200 | 9.80  | 6.90  |
| 246 | Conventional nicotine              | 200 | 10.42 | 5.56  |
| 247 | Reduced nicotine plus menthol      | 200 | 10.20 | 7.69  |
| 248 | Conventional nicotine              | 200 | 7.69  | 0.00  |
| 249 | Reduced nicotine                   | 200 | 13.95 | 15.56 |
| 250 | Conventional nicotine plus menthol | 200 | 19.15 | 13.33 |
| 251 | Conventional nicotine              | 200 | 14.58 | 10.64 |
| 252 | Conventional nicotine plus menthol | 200 | 17.65 | 13.46 |
| 253 | Reduced nicotine                   | 200 | 11.54 | 12.00 |
| 254 | Reduced nicotine plus menthol      | 200 | 6.67  | 10.64 |
| 255 | Conventional nicotine              | 200 | 9.43  | 1.79  |
| 256 | Air                                | N/A | 11.76 | 13.04 |
| 257 | Reduced nicotine                   | 200 | 10.20 | 7.27  |
| 258 | Reduced nicotine plus menthol      | 200 | 3.45  | 12.96 |
| 259 | Reduced nicotine plus menthol      | 200 | 5.71  | 4.17  |
| 260 | Conventional nicotine plus menthol | 200 | 8.62  | 6.06  |

|     |                                    |     |       |       |
|-----|------------------------------------|-----|-------|-------|
| 261 | Conventional nicotine              | 200 | 8.33  | 3.51  |
| 262 | Reduced nicotine                   | 200 | 6.56  | 1.64  |
| 263 | Conventional nicotine              | 200 | 9.23  | 4.41  |
| 265 | Reduced nicotine                   | 200 | 7.81  | 7.69  |
| 266 | Conventional nicotine plus menthol | 200 | 6.90  | 3.39  |
| 267 | Reduced nicotine plus menthol      | 200 | 6.67  | 3.39  |
| 269 | Conventional nicotine              | 200 | 9.09  | 3.45  |
| 270 | Conventional nicotine plus menthol | 200 | 9.26  | 3.51  |
| 271 | Conventional nicotine              | 200 | 11.90 | 4.44  |
| 272 | Reduced nicotine plus menthol      | 200 | 19.61 | 9.26  |
| 273 | Conventional nicotine plus menthol | 200 | 11.54 | 12.77 |
| 274 | Reduced nicotine                   | 200 | 8.77  | 3.13  |
| 275 | Reduced nicotine plus menthol      | 200 | 5.36  | 3.70  |
| 276 | Reduced nicotine                   | 200 | 10.71 | 8.62  |
| 278 | Air                                | N/A | 12.00 | 11.54 |
| 279 | Air                                | N/A | 9.09  | 5.17  |
| 280 | Reduced nicotine plus menthol      | 200 | 5.08  | 3.64  |
| 281 | Reduced nicotine plus menthol      | 200 | 9.62  | 5.88  |
| 282 | Reduced nicotine                   | 600 | 6.90  | 5.00  |

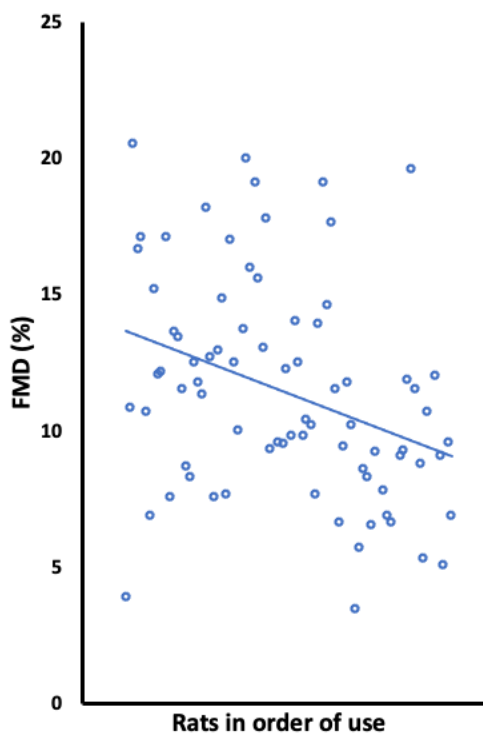

**Figure S1.** Pre- and Post- exposure FMD trend over time in rats in the experiment shown in Figure 1.

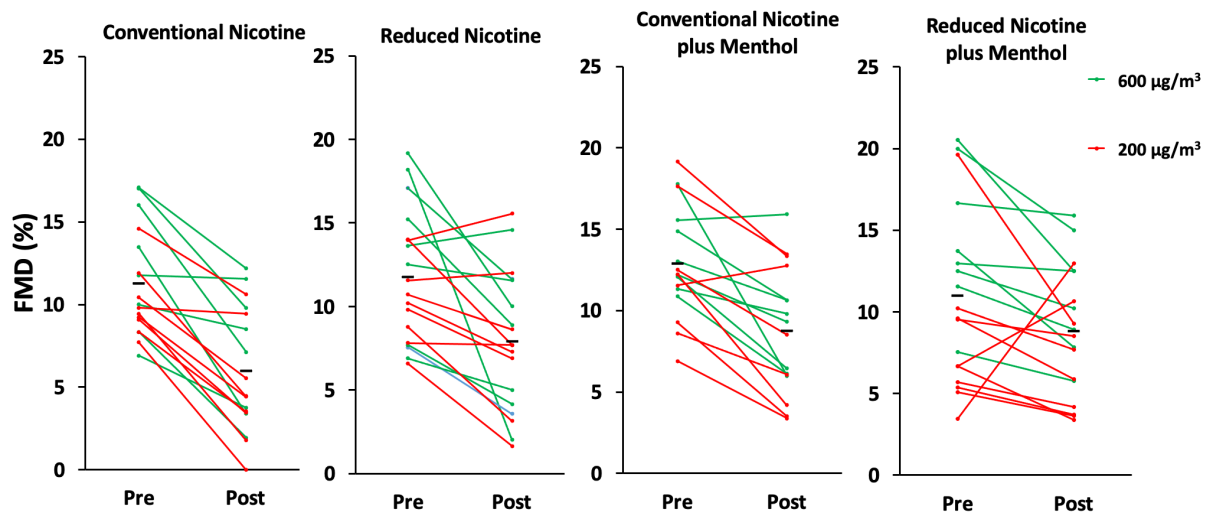

**Figure S2.** FMD in rats exposed to secondhand smoke from conventional and reduced nicotine with and without menthol addition. Green and red lines indicate rats exposed to smoke levels of  $\approx 600$  and  $\approx 200$   $\mu\text{g}/\text{m}^3$  RSP respectively.

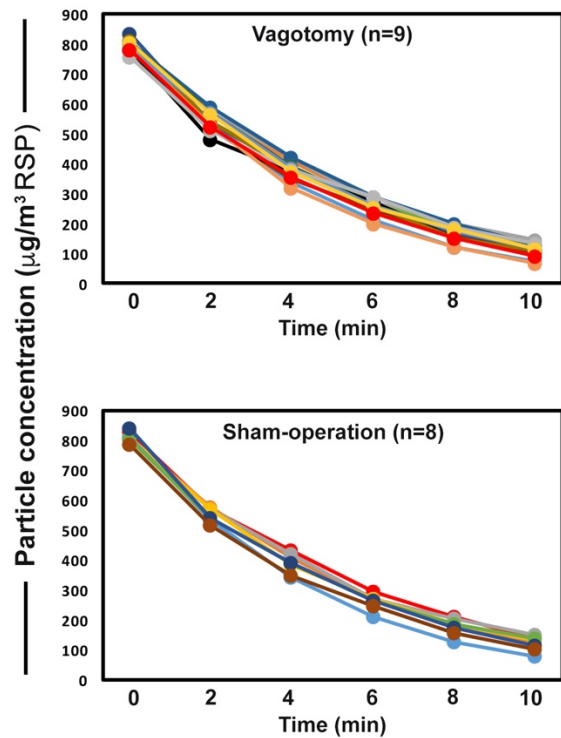

**Figure S3.** Decreasing smoke levels over time for vagotomy experiment shown in Figure 4 A-C. Levels of respirable suspended particles from tobacco sidestream smoke over 10 minutes for each rat. Mean starting concentration (mean±SD):  $790 \pm 18 \mu\text{g}/\text{m}^3$  and  $809 \pm 16 \mu\text{g}/\text{m}^3$ ; mean concentration over time:  $62 \pm 4.2 \mu\text{g}/\text{m}^3$  and  $6 \pm 4.0 \mu\text{g}/\text{m}^3$ ; and total exposure derived from the area under the curve:  $2240 \pm 119 \mu\text{g}/\text{m}^3 \times \text{min}$  and  $2305 \pm 126 \mu\text{g}/\text{m}^3 \times \text{min}$ , respectively for vagotomy and sham-operation groups. RSP, respirable suspended particles.



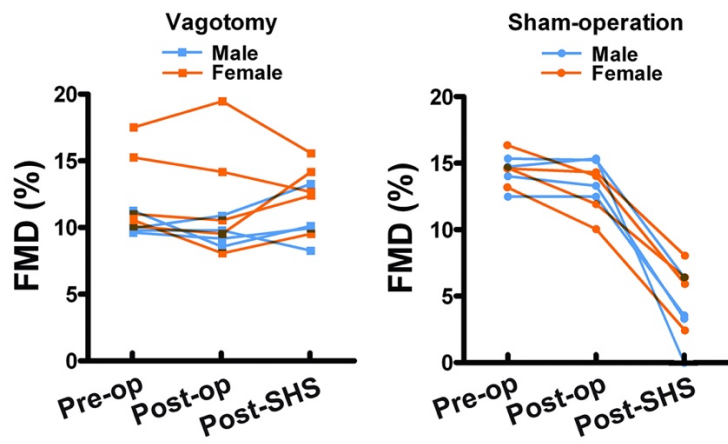

Figure S4. Distribution of FMD by gender in vagotomy and sham-operation groups.

## Major Resources Table

In order to allow validation and replication of experiments, all essential research materials listed in the Methods should be included in the Major Resources Table below. Authors are encouraged to use public repositories for protocols, data, code, and other materials and provide persistent identifiers and/or links to repositories when available. Authors may add or delete rows as needed.

### Animals (in vivo studies)

| Species | Vendor or Source                                | Background Strain | Sex                   | Persistent ID / URL |
|---------|-------------------------------------------------|-------------------|-----------------------|---------------------|
| Rat     | Simonsen Laboratory,<br>CA<br>Charles River, MI | Sprague-Dawley    | Male<br>and<br>female |                     |
|         |                                                 |                   |                       |                     |
|         |                                                 |                   |                       |                     |

### Antibodies

None

### Other

| Description | Source / Repository | Persistent ID / URL |
|-------------|---------------------|---------------------|
|             |                     |                     |
|             |                     |                     |
|             |                     |                     |

### ARRIVE GUIDELINES

The ARRIVE guidelines (<https://arriveguidelines.org/>) are a checklist of recommendations to improve the reporting of research involving animals. Key elements of the study design should be included below to better enable readers to scrutinize the research adequately, evaluate its methodological rigor, and reproduce the methods or findings.

#### Study Design

**Experiment 1:** *Assessment of FMD impairment with reduction of nicotine level and addition of menthol*

| Groups                                                    | Sex  | Age        | Number (prior to experiment) | Number (after termination) | Littermates (Yes/No) | Other description |
|-----------------------------------------------------------|------|------------|------------------------------|----------------------------|----------------------|-------------------|
| Group 1<br>Air (Control)                                  | Male | 8–10 weeks | 9                            | 0                          | No                   |                   |
| Group 2<br>Conventional Nicotine (high dose)              | Male | 8–10 weeks | 8                            | 0                          | No                   |                   |
| Group 3<br>Conventional Nicotine plus Menthol (high dose) | Male | 8–10 weeks | 8                            | 0                          | No                   |                   |
| Group 4<br>Reduced Nicotine (high dose)                   | Male | 8–10 weeks | 8                            | 0                          | No                   |                   |

|                                                                   |      |               |    |   |    |  |
|-------------------------------------------------------------------|------|---------------|----|---|----|--|
| Group 5<br>Reduced<br>Nicotine plus<br>Menthol<br>(high dose)     | Male | 8–10<br>weeks | 8  | 0 | No |  |
| Group 6<br>Conventional<br>Nicotine (low<br>dose)                 | Male | 8–10<br>weeks | 9  | 0 | No |  |
| Group 7<br>Conventional<br>Nicotine plus<br>Menthol (low<br>dose) | Male | 8–10<br>weeks | 8  | 0 | No |  |
| Group 8<br>Reduced<br>Nicotine<br>(low dose)                      | Male | 8–10<br>weeks | 9  | 0 | No |  |
| Group 9<br>Reduced<br>Nicotine plus<br>Menthol<br>(low dose)      | Male | 8–10<br>weeks | 10 | 0 | No |  |

**Experiment 2:** *Assessment of FMD impairment with inhalation of unsaturated aldehydes acrolein and acetaldehyde*

| Groups                   | Sex         | Age           | Number (prior to experiment) | Number (after termination) | Littermates (Yes/No) | Other description |
|--------------------------|-------------|---------------|------------------------------|----------------------------|----------------------|-------------------|
| Group 1<br>Air (Control) | Male/Female | 8–10<br>weeks | 8                            | 0                          | No                   |                   |
| Group 2<br>Acrolein      | Male/Female | 8–10<br>weeks | 8                            | 0                          | No                   |                   |
| Group 3<br>Acetaldehyde  | Male/Female | 8–10<br>weeks | 8                            | 0                          | No                   |                   |
| Group 4<br>Cigarette     | Male/Female | 8–10<br>weeks | 8                            | 0                          | No                   |                   |

**Experiment 3:** *Assessment of FMD impairment with inhalation of inert carbon nanoparticles*

| Groups                   | Sex  | Age           | Number (prior to experiment) | Number (after termination) | Littermates (Yes/No) | Other description |
|--------------------------|------|---------------|------------------------------|----------------------------|----------------------|-------------------|
| Group 1<br>Air (Control) | Male | 8–10<br>weeks | 8                            | 0                          | No                   |                   |
| Group 2<br>Particles     | Male | 8–10<br>weeks | 8                            | 0                          | No                   |                   |
| Group 3<br>Cigarette     | Male | 8–10<br>weeks | 8                            | 0                          | No                   |                   |

**Experiment 4: Assessment of FMD impairment recovery after inhalation of inert carbon nanoparticles**

| Groups                   | Sex  | Age        | Number (prior to experiment) | Number (after termination) | Littermates (Yes/No) | Other description |
|--------------------------|------|------------|------------------------------|----------------------------|----------------------|-------------------|
| Group 1<br>Air (Control) | Male | 8–10 weeks | 8                            | 0                          | No                   |                   |
| Group 2<br>Particles     | Male | 8–10 weeks | 8                            | 0                          | No                   |                   |

**Experiment 5: Assessment of vagus nerve role in FMD impairment caused by sidestream smoke**

| Groups                       | Sex         | Age        | Number (prior to experiment) | Number (after termination) | Littermates (Yes/No) | Other description |
|------------------------------|-------------|------------|------------------------------|----------------------------|----------------------|-------------------|
| Group 1<br>Sham<br>(Control) | Male/Female | 8–10 weeks | 8                            | 0                          | No                   |                   |
| Group 2<br>Vagotomy          | Male/Female | 8–10 weeks | 9                            | 0                          | No                   |                   |

**Sample Size:**

For FMD data, power calculation was based on standard deviations from within-group comparisons in several previous repeated-measures FMD experiments. It was determined that N=8 per group was sufficient to achieve 0.8 power to detect FMD change of 3.5 percentage points with a significance level of 0.05.

**Inclusion Criteria**

Male and female Sprague-Dawley rats (Simonsen Laboratory, CA and Charles River, MI) at 8–10 weeks of age with body weights of 200–250 g.

**Exclusion Criteria**

None.

**Randomization**

Rats were randomly assigned to different exposure conditions based on the experiment.

**Blinding**

The investigator was blinded to exposure conditions during FMD procedure, analysis of ultrasound images, and subsequent calculations.
